# Supplementary material for: Tracking Active Learning in the Medical School Curriculum: A Learning-Centered Approach
Source: PubMed Central journal article supplement — J Med Educ Curric Dev. 2018 Mar 22;5:2382120518765135. doi: 10.1177/2382120518765135 (PMC5912289; doi:10.1177/2382120518765135), 2018-03-22
Supplement: Supplementary_data.pdf [file Supplementary_data.pdf]

## Supplementary data

### Appendix

#### **Appendix A: Study Explanation and Faculty Interview Protocol (Curriculum Manager Script)**

Thanks for offering to meet with me. I would like to provide you a list of the large group teaching presentations you completed for 2015-2016.

As part of a SOMA education research study approved by the ASU IRB December 2 2016, would it be possible for me to interview you for the purpose identifying the active learning features of these teaching presentations? This process should take approximately 10 minutes.

Neither the SOMA administration nor your Department Chair is requiring you to participate in this process. The data collected today about active learning will be de-identified and aggregated, and your name will not appear on any data reports. There are no foreseeable risks or discomforts to you in our institution's sharing of the aggregate, anonymous results of this educational research. Any publishable findings will be reported in aggregate format.

#### Faculty Perceptions of Success of Active Learning Approaches

1. Refer to the list of SOMA 25 Active Learning Techniques. Do you have a signature or favorite active learning technique that you include for all of your scheduled presentations? If so, please indicate which of the 25 active learning techniques best matches the format of the lesson. You may select more than one of the techniques on the list.
2. Let's continue lecture by lecture through this list of your presentations. Are there any additional active learning techniques (from the list of 25) that you incorporated into your scheduled presentations?
3. Do you have any comments you wish to share about the success of any of the active learning approaches you've used?
4. Curriculum Coordinators: Please list any additional active learning techniques beyond the established list of 25 learning activities.

For questions about this research project, please contact Lise McCoy, EdD at 480-219-6116 or [Lmccoy@atsu.edu](mailto:Lmccoy@atsu.edu)
